# Supplementary material for: Effects of edible environmental enrichments during the rearing and laying periods in a littered aviary—Part 1: integument condition in pullets and laying hens
Source: PubMed Central journal article supplement — Poult Sci. 2020 Aug 7;99(11):5184–96. doi: 10.1016/j.psj.2020.07.013 (PMC7647713; doi:10.1016/j.psj.2020.07.013), 2020-08-07
Supplement: mmc1.pdf [file mmc1.pdf]

weeks of age

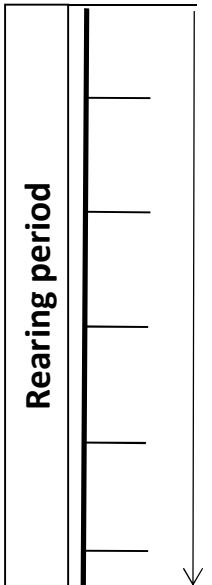

1-18: mortality and consumption of enrichment materials (daily); feed consumption and body mass (bi-weekly)

2: integument scoring

4: integument scoring

6: integument scoring

10: integument scoring

14: integument scoring

18: integument scoring

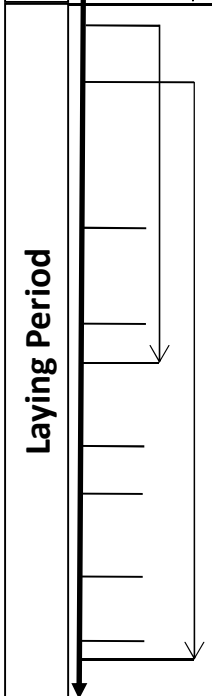

20-32: body mass (bi-weekly)

21-48: number of eggs, floor eggs, mortality and consumption of enrichment materials (daily); egg weight and egg grading (weekly); feed consumption (every 28 days)

25: integument scoring

30: integument scoring

40: integument scoring

42: egg quality testing (albumen consistency, breaking strength of egg shells)

45: body mass

48: body mass

48: integument scoring

49: body mass; weight of carcase, gizzard, and abdominal fat
